# Supplementary material for: Elucidation of the Bovine Intramammary Bacteriome and Resistome from healthy cows of Swiss dairy farms in the Canton Tessin
Source: Front Microbiol. 2023 Jul 31;14:1183018. doi: 10.3389/fmicb.2023.1183018 (PMC10425240; doi:10.3389/fmicb.2023.1183018)
Supplement: Supplementary file 2 [file Data_Sheet_1.xlsx]

## Sheet: Content
Supplementary tables content:
Supplementary table S7: Species distribution and antibiotic (AB) resistance phenotypic results based on the minimum inhibitory concentration (MIC).
Supplementary table S8: Complete results regarding the antimicrobial resistance genes (ARGs) checked with the different bioinformatic tools.
Supplementary table S9: Explanatory table regarding the different categories of antibiotic molecules, antibiotic resistant genes and the ARGs function.

## Sheet: S7_Phenotypic results review
Supplementary table S7: Species distribution and antibiotic (AB) resistance phenotypic results based on the minimum inhibitory concentration (MIC).
In the legend all the different antibiotics are listed based on their classes.
		N. of strains (%)
Genotype	N. of strains	No AB	%	1 AB	Total	%	2 AB	Total	%	3 AB	Total	%	4 AB	Total	%	> 4 AB	Total	%
Staphylococcus xylosus	101	11	10.8911	1 Azi	37	36.6337	1 Azi, Cd	34	33.6634	2 Azi, Cd, Ox	15	14.8515	1 Azi, C, E, Ox	4	3.9604		0	0
				34 Cd			1 C, Te			1 Azi, Cd, Te			1 Azi, Cd, E, Fos
				1 Ox			1 Cd, Dap			1 C, Ox, Te			1 Cd, Mup, Ox, P
				1 Te			1 Cd, Etp			4 Cd, Ox, P			1 Cd, Ox, P, Tet
							1 Cd, Mup			1 Cd, Ox, Rif
							1 Cd, Fd			6 Cd, Ox, Te
							13 Cd, Ox
							1 Cd, P
							14 Cd, Te
Mammaliicoccus sciuri	83	4	4.81928	27 Cd	27	32.5301	1 Azi, Cd	35	42.1687	1 Azi, Cd, Ox	14	16.8675	1 Cd, Dap, Ox, Rif	1	1.20482	1 Azi, Cd, E, Ox, Rif, Te	2	2.40964
							1 Azi, Ox			1 C, Cd, Fos						1 Cft, Cd, Dap, Mup, Ox, P
							1 C, Cd			1 Cp, Cd, Ox
							1 Cd, Dap			3 Cd, Dap, Ox
							29 Cd, Ox			1 Cd, Gm, Te
							1 Cd, Te			2 Cd, Mup, Ox
							1 Ox, Te			1 Cd, Ox, E
										1 Cd, Ox, Mxf
										3 Cd, Ox, Te
Staphylococcus succinus	22	7	31.8182	1 Azi	7	31.8182	1 Azi, Cd	8	36.3636
				3 Cd			1 Cd, Dap
				1 Dap			4 Cd, P
				2 Pen			2 P, Tei
Staphylococcus equorum	16	2	12.5	1 Cd	2	12.5	4 Azi, Eri	5	31.25	5 Azi, Cd, Eri	6	37.5	1 Azi, Cd, Eri, Fos	1	6.25
				1 Te			1 Cd, Dap			1 Azi, Dap, Eri
Staphylococcus aureus	9	5	55.5556	1 Azi	2	22.2222				1 Azi, Am, P	1	11.1111				1 Am, Azi, Cd, E, Gm, P	1	11.1111
				1 Cd
Mammaliicoccus vitulinus	9	5	55.5556	1 Cd	2	22.2222	1 Azi, Cd	2	22
				1 Ox			1 Cd, Ox
Staphylococcus warneri	5	3	60	2 Fos	2	40
Staphylococcus haemolyticus	3	1	33.3333	1 Azi	2	66.6667
				1 Tei
Staphylococcus chromogenes	3			2 Cd	2	67							1 Azi, Cd, E, Te	1	33.3333
Acinetobacter lwoffii	2	2	100
Aerococcus viridans	9	1	11.1111	1 Rif	1	11.1111	1 C, Tet	2	22.2222	1 Cpe, Cft, P	1	11.1111				1 C, P, Tet, T/S	4	44.4444
							1 Min Tet									1 Cpe, Cft, Cax, P
																1 Cpe, Cft, Mer, P
																1 Cax, Min, P, Tet
Arthrobacter gandavensis	2	2	100
Bacillus cereus group	35												1 Cpe, Cft, Crm, P	1	3	5 Am, Cpe, Cft, Crm, Cd, Mup, Ox, P	34	97.1429
																5 Am, Cpe, Cft, Crm, Cd, Dap, Mup, Ox, P
																3 Am, Azi, Cpe, Cft, Crm, Cd, Mup, Ox, P
																2 Am, Azi, Cpe, Cft, Crm, Cd, Dap, Mup, Ox, P
																2 Am, Cpe, Cft, Crm, Cd, Mup, P
																1 Aug, Am, Cpe, Cft, Crm, Cd, Etp, Imp, Mer, Mup, Ox, P, Rif
																1 Am, Cpe, Cft, Crm, Cd, Dap, Mup, Ox, P, To, T/S
																1 Am, Cpe, Cft, Crm, Cd, Dap, Mup, Ox, P, Tet, To
																1 Aug, Am, Cpe, Cft, Crm, Cd, Dap, Mup, Ox, P
																1 Aug, Am, Cpe, Cft, Crm, Cd, Mer, Mup, Ox, P
																1 Aug, Am, Cpe, Cft, Crm, Cd, Fos, Mup, Ox, P
																1 Am, Azi, Cpe, Cft, Crm, Cd, Etp, Mup, Ox, P
																1 Am, Cpe, Cft, Crm, Cd, Dap, Gm, Mup, Ox, P
																1 Am, Azi, Cpe, Cft, Crm, Cd, Mup, Ox, P, Rif
																1 Am, Cpe, Cft, Crm, Cd, Dap, Mup, Ox, P, Te
																1 Aug, Am, Cpe, Cft, Crm, Cd, Mup, Ox, P
																1 Am, Cpe, Cft, Crm, Cd, Mup, Ox, P, To
																1 Am, Cpe, Cft, Crm, Cd, Gm, Mup, Ox, P
																1 Am, Cpe, Cft, Crm, Cd, Mup, Ox, P, T/S
																1 Am, Cpe, Cft, Crm, Dap, Mup, Ox, P
																1 Am, Cpe, Cft, Crm, Cd, Mup, P, Te
																1 Am, Cpe, Cft, Crm, Dap, Mur, P
Enterococcus faecalis	1															1 Eri, Gm, Lin, Prs, Sts, Syn, Te	1	100
Enterococcus faecium	2						2 Lin, Rif	2	100
Enterococcus saccharolyticus	6						6 Lin, Syn	6	100
Escherichia coli	13	10	76.9231	2 CI	2	15.3846										1 Azt, NA, Fd, Nxn	1	7.69231
Lactococcus garvieae	7						1 Azi, Rif	1	14.2857							2 Am, Cpe, Cft, Cax, Crm, P, Rif	6	85.7143
																1 Cft, Cax, Crm, Cd, P, Rif
																1 Am, Cpe, Cft, Cax, Crm, Cd, P, Rif
																1 Cpe, Cft, Cax, Crm, Cd, Min, P, Rif, Te
																1 Am, Azi, Cpe, Cft, Cax, Crm, Cd, Min, Pen, Rif, Te
Lactococcus lactis	7			2 Rif	2	28.5714										1 Cft, Cax, Crm, Rif	5	71.4286
																3 Cft, Cax, Crm, P, Rif
																1 Cpe, Cft, Cax, Crm, P, Rif
Streptococcus agalactiae	11	11	100
Streptococcus uberis	4	3	75				1 Min, Te	1	25
Total	350	67	19.1429		88	25.1429		96	27.4286		37	10.5714		8	2.28571		54	15.4286
Legend antibiotics:
Abbreviation of the different antibiotics (AB) and classification in the different cathegories:
Aminoglycosides: Amikacin (AK), Gentamicin (Gm), Tobramycin (To)
Carbapenems: Doripenem (Dor), Ertapenem (Etp), Imipenem (Imp), Meropenem (Mer)
Cephalosporins: Cefepime (Cpe), Cefotaxime (Cft), Cefoxitin (Cfx), Cefuroxime (Crm), Ceftriaxone (Cax), Cephalotin (Cf)
Fluoroquinolones; Ciprofloxacin (Cp), Levofloxacin (Lvx), Moxifloxacin (Mxf), Nalidixic acid (NA), Norfloxacin (Nxn)
Glycopeptides: Teicoplanin (Tei), Vancomycin (Va)
Lincosamides: Clindamycin (Cd), Lincomycin (Lin)
Macrolides: Azithromycin (Azi), Erythromycin (E), Clarithromycin (Cla)
Monobactams; Aztreonam (Azt)
Penicillins: Ampicillin (Am), Ampicillin/Sulbactam (A/S), Amoxicillin/K clavulanate (Aug), Piperacillin (Pi), Piperacillin/Tazobactam (P/T), Oxacillin (Ox), Penicillin (P)
Streptogramyns: Streptomycin (StS), Pristinamycin (Prs)
Tetracyclines: Minocycline (Min), Tetracycline (Te), Tigecycline (Tgc)
Others; Chloramphenicol (C), Colistin (CI), Daptomycin (Dap), Fosfomycin (Fos), Fusic acid (FA), Linezolid (Lzd), Mupirocin (Mup), Nitrofurantoin (Fd), Rifampin (Rif), Synercid (Syn), Trimethoprim/sulfamethoxazole (T/S)

## Sheet: S8_Genomic results review 
Supplementary table S8: Complete results regarding the ARGs checked with the different bioinformatic tools.
		N. Strains (%)
Genotype	N. of strains	No AMR	%	1 AMR	Total	%	2 AMR	Total	%	3 AMR	Total	%	4 AMR	Total	%	> 4 AMR	Total	%
Staphylococcus xylosus	101	64	63.3663	2 cat	28	27.7228	1 fosD, erm(44)	6	5.94059	1 blaZ, mecC2, mphC	3	2.9703
				2 fosD			1 fosD, str			1 cat, mphC, msrA
				2 mphC			2 fosD, tetk			1 cat, str, tetk
				2 str			2 str, tetk
				20 tetk
Mammaliicoccus sciuri	83						68 mecA, salA	68	81.9277	3 mecA, salA, cat	14	16.8675				1 mecA, salA, aac(6')-aph(2''), lnuA, str, tetL	1	1.2
										2 mecA, salA, lnu(A)
										3 mecA, salA, str
										5 mecA, salA, tetk
										1 mecA, salA, tetL
Staphylococcus succinus	22	22	100
Staphylococcus equorum	16	2	12.5	10 mphC	12	68.75	1 mphC, str	1	6.25	1 mphC, str, tetk	1	6.25
				2 str
Staphylococcus aureus	9												3 arlR, glpT, mepR, mgrA	3	33.3333	1 arlR, arlS, LmrS, mepR, mgrA, norA	6	66.6667
																1 arlR, blaZ, ermT, glpT, mepR, mgrA, norA
																1 arlR, arlS, blaZ, FosB, Lmrs, mepR, mgrA, norA
																3 arlR, arlS, FosB, LmrS, mepA, mepR, mgrA, murA, norA
Mammaliicoccus vitulinus	9	1	11.1111	7 mphC	7	77.7778	1 mphC, mrsA	1	11.1111
Staphylococcus warneri	5			4 gyrB	4	80	1 gyrB, tetk	1	20
Staphylococcus haemolyticus	3	3	100
Staphylococcus chromogenes	3	3	100
Acinetobacter lwoffii	2			2 OXA-362	2	100
Aerococcus viridans	9	4	44.5	1 lnuA	1	11.1111	2 str, tetM	2	22.2222	2 str, tetM, catA8	2	22.2222
Arthrobacter gandavensis	2	2	100
Bacillus cereus group	35						11 BcII, fosB1	18	51.4286	15 Bc, BcII, fosB1	16	45.7143	1 Bc, BcII, fosB1, tetL	1	2.85714
							7 Bc, BcII			1 Bc, BcII, blaZ
Enterococcus faecalis	1															1 dfrE, efrA, lsA(A), APH(3')-IIIa, AAC(6')-le-APH(2``)-la, ant(6)-la, dfrD, tetL	1	100
Enterococcus faecium	2						1 msrC, aac(6')-Ii	1	50	1 msrC, aac(6')-Ii, eatAv	1	50
Enterococcus saccharolyticus	6	6	100
Escherichia coli	13															*	13	100
Lactococcus garvieae	7	3	42.8571	2 lsa(D)	3	42.8571	1 lsa(D), tetM	1	14.2
				1 tetS
Lactococcus lactis	7	3	42.8571	4 lmrD	4	57.1429
Streptococcus agalactiae	11						11 mre(A), mprF	11	100
Streptococcus uberis	4	0	0	3 patB	3	75	1 patB, tetM	1	25
Total	350	113	32.2857		64	18.2857		111	31.7143		37	10.5714		4	1.14286		21	6
* The ARGs common pattern detected by CARD for all the 13 E.coli was: acrA, acrD, AcrE, acrR, AcrS, ampH, baeR, cpxA, CRP, EF-TU, emrA, emrB, emrR, emrY, evgA, gadX, H-NS, marA, marR, mdfA, mdtB, mdtE, mdtG, mdtH, mdtM, mdtO, msbA, PmrF, soxR, soxS, YojI.
Furthermore, ARGs were isolated in addition to the common pattern: acrB (4 strains), ampC (1 strain), bacA (10 strains), EC-8 (3 strains), EC-13 (4 strains), emrE (2 strains), emrK (7 strains), evgS (5 strains), fosA7 (1 strain), GlpT (10 strains), kdpE (9 strains), mdtA (7 strains), mdtF (11 strains), mdtN (1 strain), mdtP (12 strains), TolC (2 strains), ugd (7 strains), UhpT (2 strains)

## Sheet: S9_Legend antibiotics-ARGs
Supplementary table S9: Explanatory table regarding the different categories of antibiotic molecules, antibiotic resistant genes and the ARGs function.
Antibiotic classes	ARGs	ARGs function
Aminocoumarin	mdtA	aminocoumarin efflux pump
	mdtB	aminocoumarin efflux pump
Aminoglycoside	aac(6')-aph(2'')	aminoglycoside acetyltransferase
Gentamycin (Gm), Tobramycin (To)	aac(6')-Ii	aminoglycoside acetyltransferase
	AAC(6')-le-APH(2``)-la	aminoglycoside acetyltransferase
	acrD	aminoglycoside efflux pump
	ant(6)-la	aminoglycoside nucleotidyltransferase
	APH(3')-IIIa	aminoglycoside phosphotransferase
	kdpE	aminoglycoside efflux pump regulator
	str	aminoglycoside 6-adenylyltransferase
Carbapenem	CRP	antibiotic inactivator carbapenem
Cephalosporin	EC-8	drug enzymatic inactivation drug enzymatic modification to cephalosporins
Cefepime (Cpe), Cefotaxime (Cft),	EC-13	drug enzymatic inactivation drug enzymatic modification to cephalosporins
Cefuroxime (Crm), Ceftriaxone (Cax)
Diaminopyrimidine	dfrE	trimethoprim resistant dihydrofolate reductase
Trimethoprim	dfrD	trimethoprim resistant dihydrofolate reductase
Fluoroquinolone	emrA	fluoroquinolones efflux pump
Ciprofloxacin (Cp), Moxifloxacin (Mxf)	emrB	fluoroquinolones efflux pump
Nalidixic Acid (NA), Norfloxacin (Nxn)	emrR	negative regulator fluoroquinolones efflux pump
	mdtH	fluoroquinolones efflux pump
	patB	fluoroquinolones efflux pump
Lincosamide	lmrD	lincosamides efflux pump
Clindamycin (Cd), Lincomycin (Lin)	lnuA	lincosamide nucleotidyltransferase
Macrolide	mphC	macrolide phoshotrasnferase
Azithromycin (Azi), Erythromycin (E )	mreA	macrolide efflux pump
Nitroimidazole	msbA	nitroimidazole efflux pump
Penicillin	ampC	antibiotic inactivation beta-lactamase
Ampicillin (Am), Amoxicillin/K Clavulanate (Aug)	ampH	antibiotic inactivation beta-lactamase
Oxacillin (Ox), Penicillin (P)	Bc	antibiotic inactivation beta-lactamase
	BcII	antibiotic inactivation beta-lactamase
	blaZ	antibiotic inactivation beta-lactamase
	mecA1	low affinity penicillin binding protein
	mecC2	antibiotic inactivation beta-lactamase
	OXA-362	antibiotic inactivation beta-lactamase
Peptide antibiotics	bacA	undecaprenyl pyrophosphate related proteins
	PmrF	phosphoethanolamine transferase
	ugd	phosphoethanolamine transferase
	YoJI	peptide antibiotic efflux pump
Phenicol	cat	chloramphenicol acetyltransferase
Chloramphenicol (C )	catA8	chloramphenicol acetyltransferase
Phosphonic acid	FosA7	fosfomycin thiol transferase
Fosfomycin (Fos)	FosB	fosfomycin thiol transferase
	FosB1	fosfomycin thiol transferase
	FosD	fosfomycin thiol transferase
	glpT	antibiotic target alteration phosphonic acid antibiotic
	mdtG	phosphonic acid antibiotic efflux pump
	murA	antibiotic target alteration phosphonic acid antibiotic
	UhpT	antibiotic target alteration phosphonic acid antibiotic
Tetracycline	emrK	antibiotic efflux pump acting against the tetracycline antibiotics
Minocycline (Min), Tetracycline (Te)	emrY	antibiotic efflux pump acting against the tetracycline antibiotics
	tetK	antibiotic efflux pump acting against the tetracycline antibiotics
	tetL	antibiotic efflux pump acting against the tetracycline antibiotics
	tetM	tetracycline-resistant ribosomal protection protein
	tetS	tetracycline-resistant ribosomal protection protein
Multidrug unspecific genes	acrA	antibiotic efflux pump acting against cephalosporin, disinfecting agents and antiseptics, fluoroquinolone, glycylcycline, penam, phenicol, rifamycin, tetracycline antibiotics
	acrB	antibiotic efflux pump acting against cephalosporin, disinfecting agents and antiseptics, fluoroquinolone, glycylcycline, penam, phenicol, rifamycin, tetracycline antibiotics
	acrE	antibiotic efflux pump acting against cephalosporin, cephamycin, fluoroquinolone, penam antibiotics
	acrR	antibiotic efflux pump acting against cephalosporin, disinfecting agents and antiseptics, fluoroquinolone, glycylcycline, penam, phenicol, rifamycin, tetracycline antibiotics
	acrS	antibiotic efflux pump acting against cephalosporin, cephamycin, disinfecting agents and antiseptics, fluoroquinolone, glycylcycline, penam, phenicol, rifamycin, tetracycline antibiotics
	arlR	major facilitator superfamily antibiotic efflux pump to fluoroquinolone antibiotic, disinfecting agents and antiseptics
	arlS	major facilitator superfamily antibiotic efflux pump to fluoroquinolone antibiotic, disinfecting agents and antiseptics
	baeR	antibiotic efflux pump acting against aminocoumarin and aminoglycoside antibiotics
	cpxA	antibiotic efflux pump acting against aminocoumarin and aminoglycoside antibiotics
	efrA	ATP-binding cassette ribosomal protection proteins to fluoroquinolone, macrolide and rifamycin antibiotics
	EF-Tu	sequence variants that confer resistance to elfamycin antibiotics
	emrE	small multidrug resistance proteins
	eataV	ATP-binding cassette ribosomal protection proteins to lincosamides, streptogramins and pleuromutilins
	erm(44)	ribosomal RNA methyltransferase, confers reistance to lincosamide and macrolide
	ermT	ribosomal RNA methyltransferase, confers reistance to lincosamide, macrolide and streptogramins antibiotics
	evgA	antibiotic efflux pump acting against fluoroquinolone, macrolide, penam and tetracycline antibiotics
	evgS	antibiotic efflux pump acting against fluoroquinolone, macrolide, penam and tetracycline antibiotics
	gadX	antibiotic efflux pump acting against fluoroquinolone, macrolide, penam antibiotics
	gyrB	mutation resulting in aminocoumarin resistance
	H-NS	antibiotic efflux pump acting against cephalosporin, cephamycin, fluoroquinolone, macrolide, penam, tetracycline antibiotics
	LmrS	major facilitator superfamily (MFS) antibiotic efflux pump to aminoglycosides, diaminopyrimidine, macrolide, oxazolidinone, phenicol antibiotics
	lsaA	ABC-F protein confers resistance to lincosamides, streptogramin A's and pleuromutilins
	lsaD	ABC-F protein confers resistance to lincosamides, streptogramin A's and pleuromutilins
	marA	antibiotic efflux pump to different categories of antibiotics, general bacterial porin with reduced permeability to beta-lactams
	marR	antibiotic efflux pump to different categories of antibiotics
	mdfA	antibiotic efflux pump acting against disinfecting agents, amtiseptics and tetracycline antibiotics
	mdtE	antibiotic efflux pump acting against fluoroquinolone, macrolide, penam antibiotics
	mdtF	antibiotic efflux pump acting against fluoroquinolone, macrolide, penam antibiotics
	mdtM	antibiotic efflux pump acting against disinfecting agents and antiseptics, fluoroquinolone, lincosamide, nucleoside, phenicol antibiotics
	mdtN	antibiotic efflux pump acting against disinfecting agents and antiseptics, nucleoside antibiotics
	mdtO	antibiotic efflux pump acting against disinfecting agents and antiseptics, nucleoside antibiotics
	mdtP	antibiotic efflux pump acting against disinfecting agents and antiseptics, nucleoside antibiotics
	mepA	multidrug and toxic compound extrusion transporter to tetracycline and glycylcycline
	mepR	multidrug and toxic compound extrusion transporter to tetracycline and glycylcycline
	mgrA	major facilitator superfamily (MFS) antibiotic efflux pump, ATP-binding cassette (ABC) antibiotic efflux pump to peptide, fluoroquinolone, disinfecting agents and antiseptics, tetracycline, cephalosporin and penam antibiotics
	mprf	antibiotic target alteration to cationic peptides
	msrA	ribosomal protection protein with confer resistance to macrolide and streptogramin antibiotics
	msrC	ABC-F protein with confer resistance to macrolide and streptogramin antibiotics
	norA	major facilitator superfamily antibiotic efflux pump to fluoroquinolone antibiotic, disinfecting agents and antiseptics
	salA	ABC-F protein with confer resistance to lincosamide, pleuromutilin and streptogramin antibiotics
	soxR	antibiotic efflux pump to different categories of antibiotics
	soxS	antibiotic efflux pump to different categories of antibiotics
	TolC	antibiotic efflux pump to different categories of antibiotics
